# Supplementary material
Source: ML conference proceedings conference paper supplement (https://aclanthology.org/2023.findings-eacl.91)
Supplement: dataset [file 2023.findings-eacl.91.dataset.zip]

---

# Annotation of References to *The Elite* and *The People* in Parliamentary Debates

---

Ines Rehbein  
Version 1.0

## Abstract

This paper describes the annotation of references to *The Elite* and *The People* in debates of the German Bundestag. Detecting references to instances of *The Elite* and *The People* is an important first step towards automatically identifying populist rhetoric in political texts. Under *The Elite*, we include all individuals, organizations, institutions, and groups that have some impact on politics and society. In addition, we mark all references to instances of the people, i.e., groups in the population, that are referenced in the political discourse.

## Contents

|          |                                                 |          |
|----------|-------------------------------------------------|----------|
| <b>1</b> | <b>Introduction</b>                             | <b>2</b> |
| 1.1      | Classification Scheme . . . . .                 | 2        |
| <b>2</b> | <b>Description of the classes</b>               | <b>3</b> |
| 2.1      | Elite . . . . .                                 | 3        |
| 2.2      | The People . . . . .                            | 6        |
| <b>3</b> | <b>Some Practical Tips</b>                      | <b>7</b> |
| 3.1      | Specific syntactic constructions . . . . .      | 7        |
| 3.2      | Special rules and idiosyncratic cases . . . . . | 9        |

| Level I   | <i>Elite E</i>     |               |                        |               | <i>People P</i>    |               |
|-----------|--------------------|---------------|------------------------|---------------|--------------------|---------------|
| Level II  | <i>Person P</i>    |               | <i>Organ O</i>         |               | –                  |               |
| Level III | <i>Subclasses:</i> | <i>Label:</i> | <i>Subclasses:</i>     | <i>Label:</i> | <i>Subclasses:</i> | <i>Label:</i> |
|           | Politics           | EPOL          | Politics               | EOPOL         | Nation             | PNAT          |
|           | Economy            | EP ECON       | Economy                | EOECON        | Ethnicity/Religion | PETH          |
|           | Finance            | EPFINANCE     | Finance                | EOFINANCE     | Funktion/Beruf     | PFUNC         |
|           | Media              | EPMEDIA       | Media                  | EO MEDIA      | Alter              | PAGE          |
|           | Science            | EPSCI         | Science                | EOSCI         | Soziales           | PSOC          |
|           | Religion           | EPREL         | Religion               | EOREL         | Generisch          | PGEN          |
|           | Culture            | EP CULT       | Culture                | EOCULT        |                    |               |
|           | Military           | EP MIL        | Military               | EO MIL        |                    |               |
|           | NGOs/Associations  | EPNGO         | NGOs/Associations      | EO NGO        |                    |               |
|           | Movements          | EP MOV        | Movements              | EO MOV        |                    |               |
|           | <i>Other:</i>      |               |                        |               |                    |               |
|           | I, me              | EPOWN         | geo-political entities | GPE           |                    |               |

Table 1: Overview of the classification scheme.

## 1 Introduction

### 1.1 Classification Scheme

Our schema builds upon and extends the categories in the codebook of [Wirth et al., 2019, p.12].<sup>1</sup>

#### Classes:

- I Elite vs People: At the top level, we distinguish between instances of *Elite* and the *People*. We use a very broad notion of *Elite*, encompassing all individuals and groups that have some influence in politics and society. This includes individuals, groups of individuals, organizations, associations, and institutions that play an influential role in politics and society and thus shape and contribute to shaping society.
- II Person vs Organ: On the next level we distinguish between references to individuals and groups of individuals (Angela Merkel; Merkel and Scholz; the colleagues from the CDU) on the one hand and references to political/governmental bodies and institutions (the SPD; the EU; the investigative commission), associations, organizations from the economy and society, institutionalized social organizations and movements on the other hand. The term ORGAN is used here (somewhat imprecisely) as an umbrella term for all the organizational forms listed above.
- III Domains (Elite): At level III, both classes of elite (person, organ) are further subdivided into more fine-grained sub-domains:
- Politics (CDU, the Greens, the EU)
  - Economy (BMW, Amazon, Wirecard)
  - Finance (Lehman Brothers, the Volksbanken)
  - Media (FAZ, Twitter, Facebook, ARD)
  - Science (Uni Mannheim, CERN, Fraunhofer-Gesellschaft)
  - Religion (the Pope, the catholic church, the Central Council of Muslims)
  - Culture (Deutsche Oper, Elfriede Jelinek, Madonna)

<sup>1</sup> <https://osf.io/2z3dk/>

- Military (Bundeswehr, the Air Force)
- Associations and organisations (ver.di, DGB, ADAC, BUND, AI, Red Cross, ATTAC)
- Movements (Antifa, Fridays for Future, Querdenker)

II THE PEOPLE: Die Klasse VOLK umfasst Referenzen auf (Unter-)Gruppen der Bevölkerung (die Deutschen, die Steuerzahler) oder generische Referenzen auf das Volk oder Untergruppen der Bevölkerung (Gabi Mustermann; John Q. Public; der kleine Mann von der Straße).

III Domains (People): We distinguish the following domains:

- Nation (die Deutschen, der Russe)
- Ethnicity & Religion (die Türkendeutschen, die Juden, die Christen)
- Function & Beruf (die Steuerzahler, die Professoren)
- Age (The thirty-somethings, teenager, pensioners)
- Social variables (the working class, women, transgender)

Other classes: We also annotate the two classes:

1. 1st person singular personal pronouns (*I*, *me*) (EPOWN) that refer to the speaker and can be assigned the class Elite-Person-Own
2. geo-political entities (GPE)

Wiktionary describes GPEs as

“A geographical area which is associated with some sort of political structure.”

We include countries, states, cities, multinational geo-political entities such as Europe, etc.

## 2 Description of the classes

### 2.1 Elite

As elite, we consider persons, groups of persons, organizations, associations and institutions that play an influential role in politics and society and thus shape and help shape society. These include power elites, economic, legal and cultural elites, and educational elites.

We divide members of the elite into PERSONS and ORGANS.

#### 2.1.1 Persons

All references to specific people that are part of the elite (individuals as well as groups of people) fall into this class.

#### 2.1.2 Organs

This class includes all mentions of state and political organs and institutions (the SPD; the EU; the Investigation Commission), associations (ver.di, ADAC), organizations from economy and society (Siemens; Deutsche Oper), institutionalized social organizations (HU Berlin; IDS Mannheim; the BVG) and movements (Fridays for Future, Querdenker)

on the other hand. The term “organ” is used here (somewhat imprecisely) as an umbrella term for all the organizational forms listed above.

We further divide both classes (people and organs) into the following domains:

Politics, Economy, Finance, Associations, Mass Media, Science, Culture, Religion, Military, Movements

Politics:

| Description                | Examples                                  |
|----------------------------|-------------------------------------------|
| Politicians                | Merkel, Özdemir, the foreign minister     |
| Parties                    | CDU, FDP, The Greens                      |
| Coalitions                 | Groko, Ampel, Jamaika                     |
| Justicial system           | BGH, Federal Constitutional Court         |
| Committees & Boards        | commission of inquiry, Central Committee  |
| Political organs           | federal and state governments, parliament |
| Supranational institutions | EZB, EU, NATO, UN                         |

Economy:

| Description             | Examples                            |
|-------------------------|-------------------------------------|
| Concerns                | Google, Mercedes, BASF              |
| Employers’ associations | BDI, Gesamtmetall                   |
| Unions                  | DGB, ver.di, IG Metall              |
| trade associations      | Industriemeisterverband Deutschland |

Finance:

| Description                      | Examples                       |
|----------------------------------|--------------------------------|
| Banks                            | Lehman Brothers, Deutsche Bank |
| Organisations & trusts           | World Economic Forum, IWF      |
| Bankers, brokers & fonds manager |                                |

Mass media:

| Description  | Examples                              |
|--------------|---------------------------------------|
| Print media  | FAZ, taz, Bild, NYT, WSJ              |
| Radio        | Deutschlandfunk, SWR2, HR3            |
| Social media | Twitter, Facebook, Instagram, Tik-Tok |

Military:

| Description         | Examples                         |
|---------------------|----------------------------------|
| Armies              | Bundeswehr, US Army              |
| Military leadership | inspector general, major general |

Science:

| Description             | Examples                                                      |
|-------------------------|---------------------------------------------------------------|
| Universities            | Uni Saarland, HU Berlin, Sorbonne                             |
| Research centers        | Max-Planck-Gesellschaft, RKI, CERN                            |
| Researchers             | Albert Einstein, Benjamin List, Marie Curie (Nobel laureates) |
| Experts                 | Christian Drosten, Lothar Wieler                              |
| Scientific associations | Leibniz-Gemeinschaft, GSCL, DGfS                              |

Companies in the medical sector, such as BionTech SE, are not considered as scientific institutions but are assigned to the economy domain.

Culture:

| Description      | Examples                                          |
|------------------|---------------------------------------------------|
| Artists          | Herta Müller, Lion Feuchtwanger, Picasso, Beatles |
| Top-level sports | Roger Federer, Christiano Ronaldo, Kimmich        |
| Celebrities      | Kayne West, Ellen Degeneres                       |
| Academies        | Goethe-Institut, Akademie of Arts                 |

Only for renowned, distinguished persons with a high social standing (Nobel Prize, Oscar, Pulitzer, other cultural awards) as well as top athletes and celebrities.

We do not include museums and art sites.

Religion:

| Description             | Examples                                  |
|-------------------------|-------------------------------------------|
| Religious leaders       | Pope, Ayatollah, Dalai Lama               |
| Religious organisations | EKD, Central Council of Jews, Milli Görüş |

We do not consider the Muslim Brotherhood as a religious organisation but as a movement.

References to places of worship such as the Şehitlik Mosque, the Cologne Cathedral or the New Synagogue Berlin are not included in the annotation.

Associations:

| Description                       | Examples                                    |
|-----------------------------------|---------------------------------------------|
| NGOs                              | Amnesty International, Greenpeace, WWF      |
| Clubs and societies               | Bayern München, carnival society, ADAC      |
| Sport associations                | German soccer federation, tennis federation |
| Welfare organisations & charities | AWO, Oxfam, Sisters of Mercy                |

This class covers non-commercial civil society advocacy groups and organizations. This includes NGOs that “through their activities seek to alleviate suffering, represent the interests of the poor in the public sphere, protect the environment, provide basic social services, or initiate action for development projects” (definition World Bank, see Wikipedia). Furthermore, sports clubs and other non-profit organizations such as charities (e.g., the Workers’ Welfare Association) fall into this category.

We do not annotate the rabbit breeders’ club of East Cupcake, but only those associations that can be counted among the elite due to their social influence.

Note that we assign unions to this domain (and not to the Economy domain).

Movements:

| Description             | Examples                            |
|-------------------------|-------------------------------------|
| Environmental movements | Fridays for Future                  |
| Action groups           | Gorleben, Startbahn West            |
| Civil rights movements  | AIM, Black Lives Matter             |
| SM campaigns            | #MeToo                              |
| Emancipatory movements  | feminist movement                   |
| Subcultures             | Incel                               |
| Conspiracy theorists    | QANON, Querdenker                   |
| Terror organisations    | PKK, IRA, Rote Armee Fraktion (RAF) |

As Movements we only count groups without an organizational structure (no clubs, associations, organizations, etc.). Attac, for example, does not belong to the Movement domain but is an NGO with an organisational structure and a scientific advisory board and a membership card.

## 2.2 The People

There is no subdivison of the THE PEOPLE class on the second level. On the third level, we distinguish between the following domains.

**Nation:** Under nation, we include categorizations of instances of the people that are based on the concept of the nation. The crucial focus here is not on language, culture or tradition, but on citizenship in a particular nation-state. Examples are:  
The Germans; the Turks; the French; as well as generic uses such as “the Russian”, “the German” (as in: The German loves wine, women and song).

**Ethnicity & Religion:** This class focusses on belonging / social affiliation to a certain culture, defined by a common language or traditions and customs: PoC, Russian Germans, German Turks, Yazidis, Christians, Muslims, Jews, Slavs, the Jehovah’s Witnesses.

**Function & Profession:** This class covers the reference to a population group based on profession, occupation or function: Irish farmers, the farmers, taxpayers, the unemployed, teachers, the voters, single parents.

**Age:** Reference to a group defined based on age: the older generation, adolescents, mid-twenties, teenagers.

**Social variables:** This category covers variables related to social class (the working class, the top ten thousand), gender (women and girls, transgender), and sexual identity (lesbian, gay).

Generic references: References to individuals such as “Otto Normalverbraucher”, “Jane Doe” and “Gabi Mustermann” who are stereotypical representatives of the characteristics and needs of the population as a whole.

### 3 Some Practical Tips

What (not) to annotate:

We annotate references to persons, expressed mainly by nouns and proper names. Other references, e.g. adjectival references (*German*, *unemployed*) are not included in the annotation (see (1)-(3)). Pronouns (*she*, *we*, *he*, *everyone*, *all*, ...) are also not annotated (see (4)), with the following exceptions:

1. 1st person singular personal pronouns *I*, *me* are assigned to the class EPOWN (Elite-Person-Own) (5).
2. We also annotate phrases with a pronoun as head, if the pronoun is disambiguated by the rest of the phrase (e.g., *we* Members of Parliament; *all of us* here in this august House; *everyone* here in Parliament; etc.) (6)

- (1) The *German* interests must be taken more into account.
- (2) We must promote (*the unemployed* PFUNC)
- (3) She has been *unemployed* for two years.
- (4) (*Mrs. Merkel* EPPOL) said in *her* speech ...
- (5) (*I* EPOWN) started *my* speech by ...
- (6) (*We congressmen* EPPOL) must decide ...

We annotate the entire nominal phrase, including complement clauses and modifiers (and not just the head of the NP), as those provide information that is necessary to disambiguate between the different labels. For illustration, see the examples below:

- (7) (Old [**people**] who have been falling into poverty as a result of pension cuts PAGE)
- (8) ([**Folks**] who have served their country in the military PFUNC)
- (9) ([**People**] who share their native language and cultural background PETH)
- (10) (All [**residents**] with German citizenship PNAT)
- (11) ([**People**] from all over the world PGEN)

#### 3.1 Specific syntactic constructions

Prepositional phrases:

Nominal phrases are often embedded in prepositional phrases. However, we only annotate the nominal phrase, excluding the preposition.

The reign of ✓ EPPOL Angela Merkel lasted 16 years

The reign ✗ EPPOL of Angela Merkel lasted 16 years

### Embedded phrases:

For embedded phrases, we annotate both the embedded phrase and the phrase that embeds it (but, of course, only if those phrases are relevant to our schema).

For example:

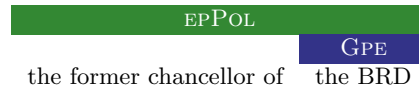

oder

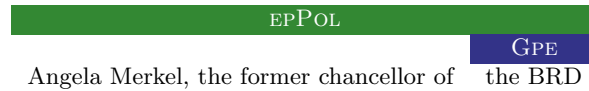

If the embedded phrase refers to the same entity as the head of the phrase (here *Angela Merkel*), then we do not annotate it separately. See the following example, where *the chancellor* is a reference to *Angela Merkel* and is therefore only annotated once:

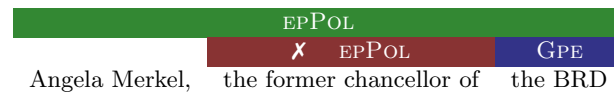

### Coordination:

For coordination, we annotate each conjunct separately and also the entire coordinated phrase, e.g.:

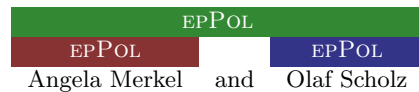

oder:

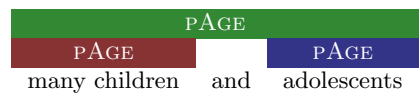

or:

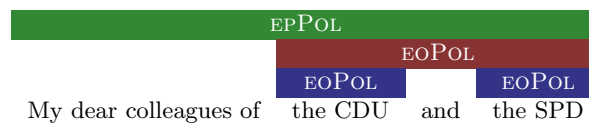

### Instances with multiple labels:

In principle, it is possible for an instance to belong to more than one class. In this case, the annotators can also assign more than one label. However, this should be used with caution.

Examples of instances with multiple labels:

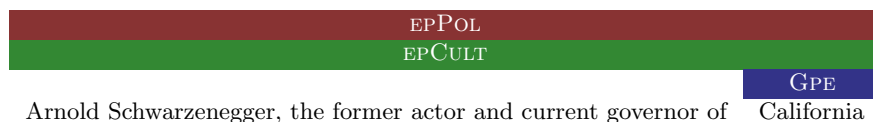



### 3.2 Special rules and idiosyncratic cases

The table below lists frequent and ambiguous cases for which we have decided on how to treat them:

| Instance                        | Label | Comment                                    |
|---------------------------------|-------|--------------------------------------------|
| Dear Sir or Madam               | –     | formulaic form of address, do not annotate |
| Dear colleagues                 | –     | formulaic form of address, do not annotate |
| my dear colleagues from the CDU | EPOL  | specific persons in the Bundestag          |
| the next speaker                | EPOL  | refers to politicians in the Bundestag     |
| we Free Democrats               | EOPOL | ambiguous between person and body (party)  |
| we Greens                       | EOPOL | ambiguous between person and body (party)  |
| this House                      | EOPOL | reference to the Bundestag                 |
| the legislature                 | EOPOL | reference to the legislature               |
| Politics                        | EOPOL | reference to the government/parliament     |

Table 2: Some special cases and their treatment.

## References

[Wirth et al., 2019] Wirth, W., Wettstein, M., Wirz, D., Ernst, N., Büchel, F., Schulz, A., Esser, F., and et al (2019). *Codebook: NCCR democracy Module II: The Appeal of populist Ideas and Messages*. unpublished paper.

## Index

ELITE, 2, 3  
ELITE-ORGAN, 2, 3  
EOECON, 4  
EOFINANCE, 4  
EOMEDIA, 4  
EOMIL, 4  
EOMOV, 6  
EONGO, 5  
EOPOL, 4  
EOREL, 5  
EOSCI, 5  
ELITE-PERSON, 2, 3  
EPOWN, 3  
GPE, 3  
THE PEOPLE, 2, 3, 6  
PAGE, 6  
PETH, 6  
PFUNC, 6  
PGEN, 7  
PNAT, 6  
PSOC, 6

Coordination, 8

Domains, 2, 3

Embedded phrases, 8

Instances with multiple labels, 8

Prepositional phrases, 7
